# Supplementary material for: Similarity of Cortical Activity Patterns Predicts generalization Behavior
Source: PubMed Central journal article supplement (PMC3797841; doi:10.1371/journal.pone.0078607), 2013-10-16

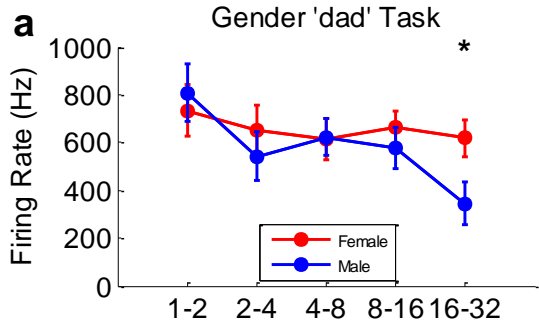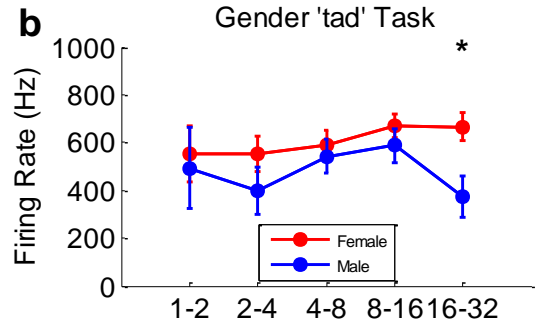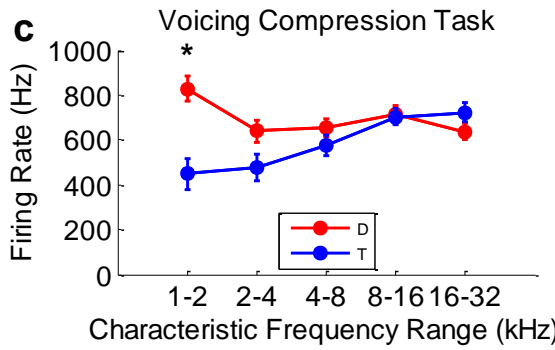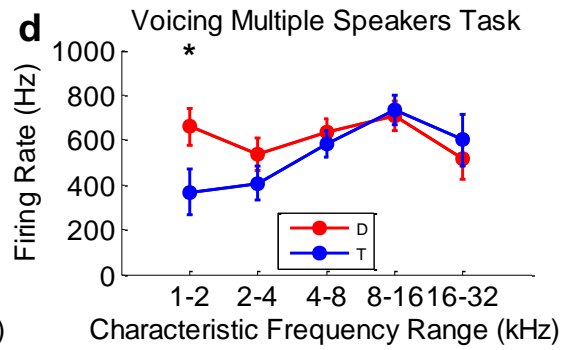

Supplement: pone.0078607.s004.pdf [file pone.0078607.s004.pdf]
